# Supplementary material for: Novel Gallium(III), Germanium(IV), and Hafnium(IV) Folate Complexes and Their Spectroscopic, Thermal Decomposition, Morphological, and Biological Characteristics
Source: Hindawi journal article supplement (doi:10.1155/2020/6678688), 2020-12-18

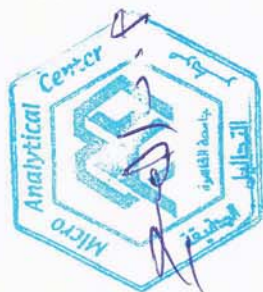

MoaminSaTah-P20-DMSO-H1

Archive directory: /export/home/vnmr1/vnmrSYS/data  
Sample directory: D05mm\_test\_12Mar2014-21:34:40  
File: PROTON

Pulse Sequence: s2pu1

Solvent: DMSO  
Temp. 30.0 C / 303.1 K  
Mercury-300BB "NMR300"

Relax. delay 1.000 sec  
Pulse 45.0 degrees  
Acq. time 4.853 sec  
Width 6600.7 Hz  
99 repetitions

OBSERVE H1, 300.0687871 MHz  
DATA PROCESSING  
FT size 65536  
Total time 43 min, 34 sec  
Date: Sep 21 2016

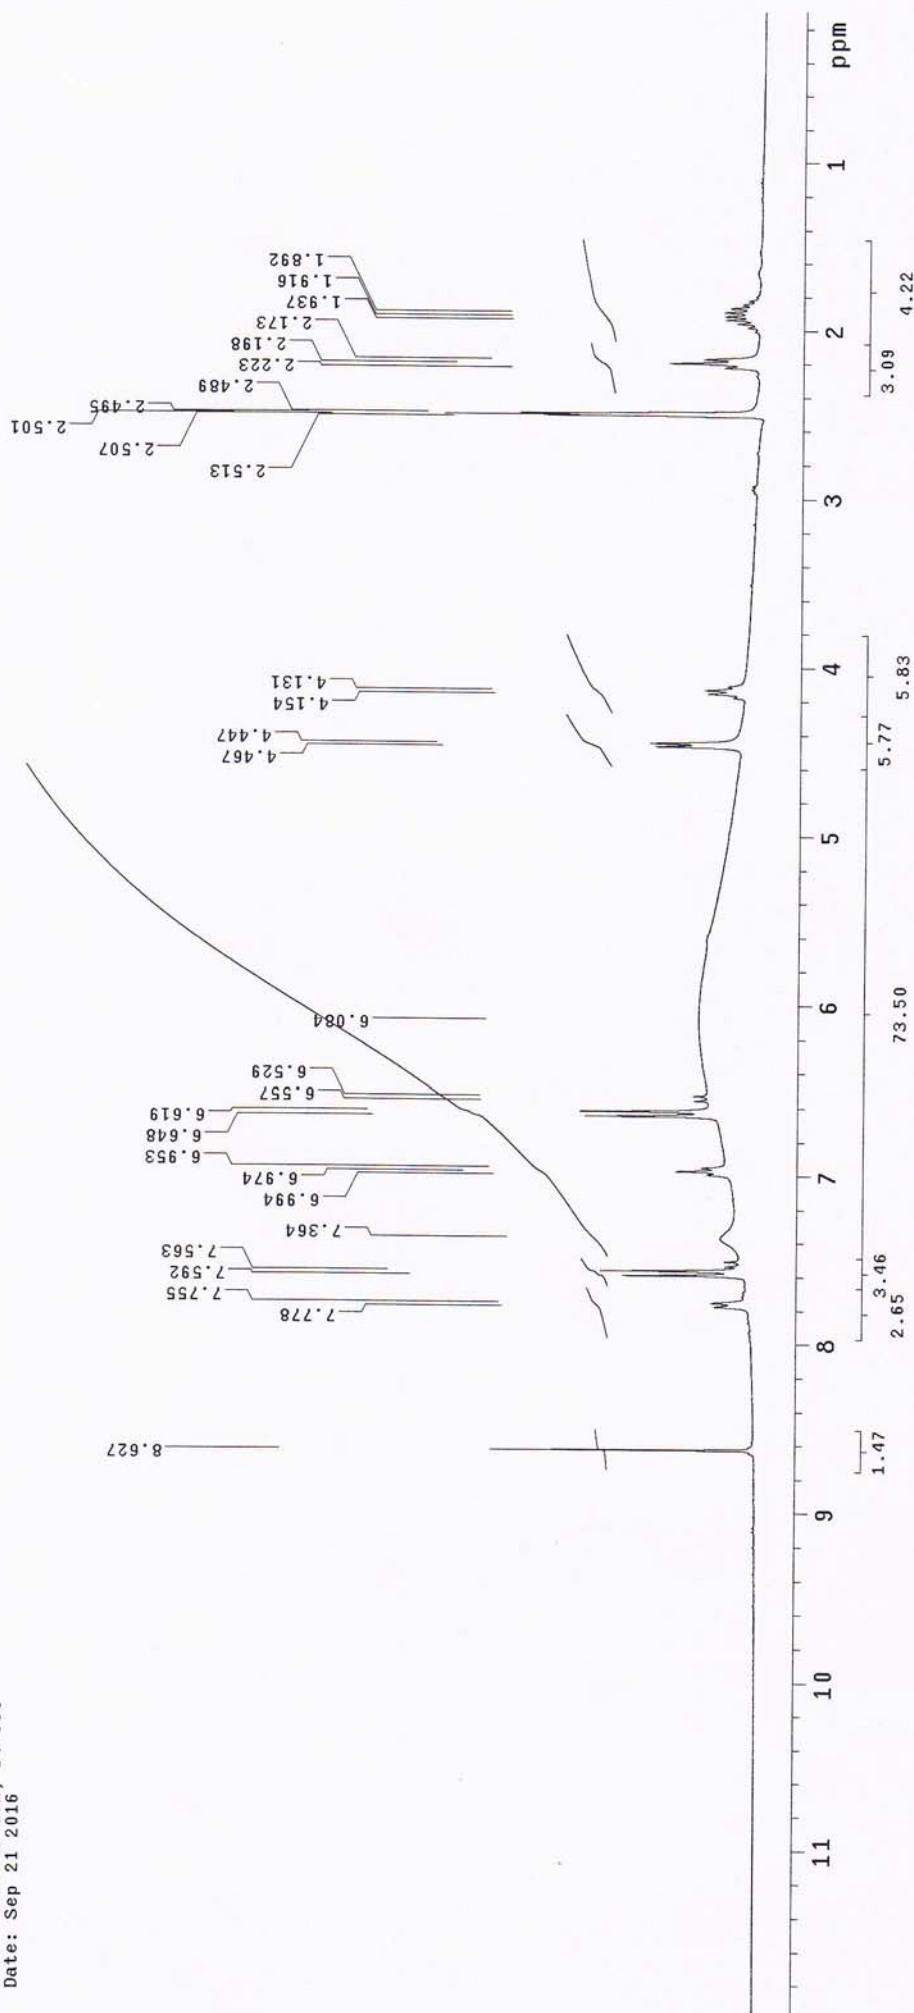

Supplement: f1 [file 6678688.f1.zip]
