# Supplementary material for: Novel Gallium(III), Germanium(IV), and Hafnium(IV) Folate Complexes and Their Spectroscopic, Thermal Decomposition, Morphological, and Biological Characteristics
Source: Bioinorg Chem Appl. 2020 Dec 18;2020:6678688. doi: 10.1155/2020/6678688 (PMC7769666; doi:10.1155/2020/6678688)
Supplement: Supplementary Materials — Supplementary files included in the manuscript are 1HNMR spectra of the FAH2-free ligand (Figure 1S), Ga(III) complex (Figure 2S), and Ge(IV) complex (Figure 3S) in DMSO-d6. [file 6678688.f1.zip]

Archive with 3 entries (3 files):
- 6678688.f1/Fig 1S ,HNMR of Folic acid.pdf
- 6678688.f1/Fig 2S HNMR of Ga-complex.pdf
- 6678688.f1/Fig 3S HNMR of Ge-complex.pdf
